# Supplementary material for: Conformational-transited protein corona regulated cell-membrane penetration and induced cytotoxicity of ultrasmall Au nanoparticles
Source: PubMed Central journal article supplement — RSC Adv. 2019 Feb 5;9(8):4435–44. doi: 10.1039/c8ra10049g (PMC9060578; doi:10.1039/c8ra10049g), 2019-02-05
Supplement: RA-009-C8RA10049G-s001.pdf [file RA-009-C8RA10049G-s001.pdf]

## Supporting informations

### **Conformational-transited Protein Corona regulated cell-membrane penetration and Induced Cytotoxicity of Ultrasmall Au Nanoparticles**

Huayan Yang\*<sup>1</sup>, Meng Wang<sup>1</sup>, Yanmin Zhang<sup>1</sup>, Feng Li<sup>2</sup>, Shaoning Yu<sup>3</sup>, Lin Zhu<sup>1</sup>, Yuming Guo<sup>1</sup>, Lin Yang\*<sup>1</sup>, Shouning Yang \*<sup>1</sup>

1. Key Laboratory of Green Chemical Media and Reactions, School of Chemistry and Chemical Engineering, Collaborative Innovation Center of Henan Province for Green Manufacturing of Fine Chemicals, Ministry of Education, Henan Normal University, Xinxiang, People's Republic of China

2. University of Shanghai for Science and Technology, Shanghai, People's Republic of China

3. Fudan University, Shanghai, People's Republic of China

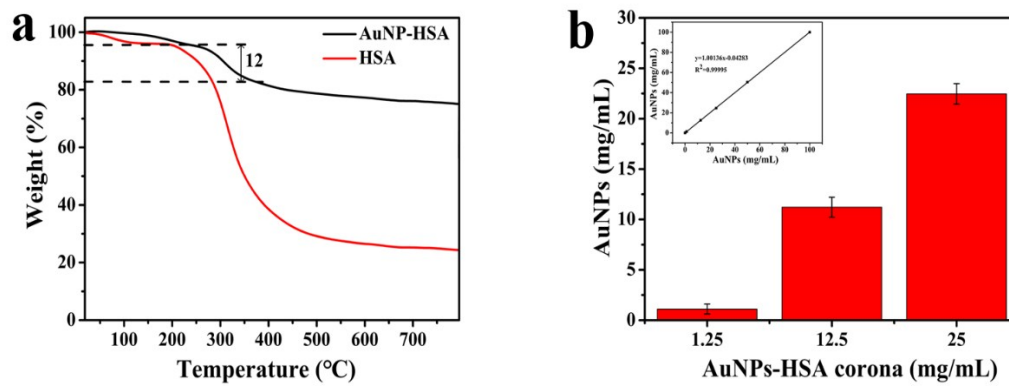

**Fig. S1 (a) Thermogravimetric decomposition trace of Au-HSA corona and HSA. (b) ICP-MS analysis of Au ions in Au-HSA corona. Data represent mean  $\pm$  SEM (n = 3 per group).**

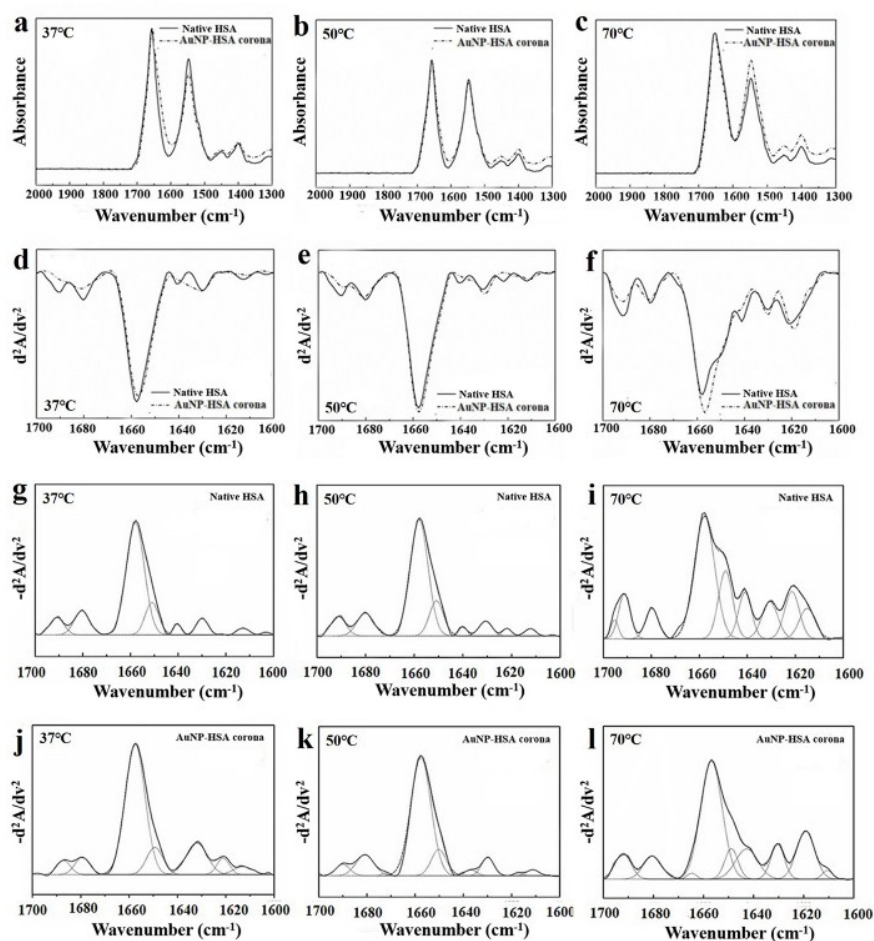

**Fig. S2. a~c.** the original FTIR spectra of free HSA and HSA coated on AuNPs at different temperature (37°C, 50°C and 70 °C).

**d~f.** Secondary derivative figures (FTIR) of free HSA and HSA coated on AuNPs at different temperature (37°C, 50°C and 70 °C).

**g~l** Curve-fitted inverted second-derivative amide I spectrum(FTIR spectra) of HSA and HSA coated on AuNPs at different temperature (37°C, 50°C and 70 °C).

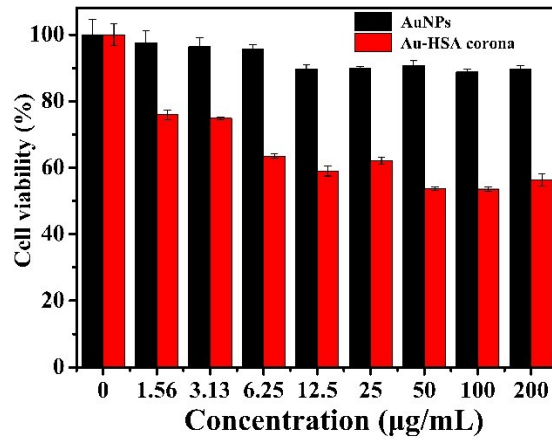

**Fig. S3** (a) Cell viability of 293T cells incubated with AuNPs and Au-HSA corona for 6 h at different concentrations (200, 100, 50, 25, 12.5, 6.25, 3.13, 1.56 µg mL<sup>-1</sup>).

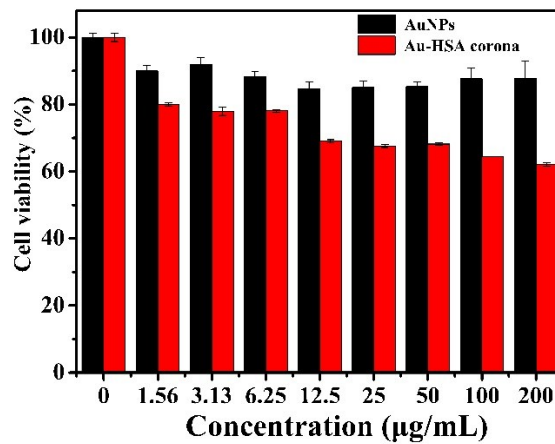

**Fig.S4.** 3A cellular viability comparisons in different concentration of AuNPs and AuNPs-corona in complete medium (with 10% fetal bovine serum).

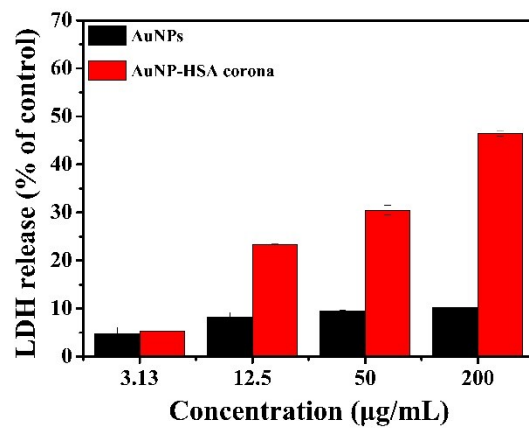

**Fig. S5.** LDH release from 293T cells exposed to AuNPs and Au-HSA corona for 6 h.
